# Supplementary material for: Enabling precision medicine by unravelling disease pathophysiology: quantifying signal transduction pathway activity across cell and tissue types
Source: PubMed Central journal article supplement (PMC6367506; doi:10.1038/s41598-018-38179-x), 2019-02-07
Supplement: 41598_2018_38179_MOESM1_ESM.pdf [file 41598_2018_38179_MOESM1_ESM.pdf]

## SUPPLEMENT

### Enabling precision medicine by unravelling disease pathophysiology: quantifying signal transduction pathway activity across cell and tissue types

Anja van de Stolpe, Laurent Holtzer, Henk van Ooijen, Marcia Alves de Inda, Wim Verhaegh

Philips Research, Eindhoven, The Netherlands

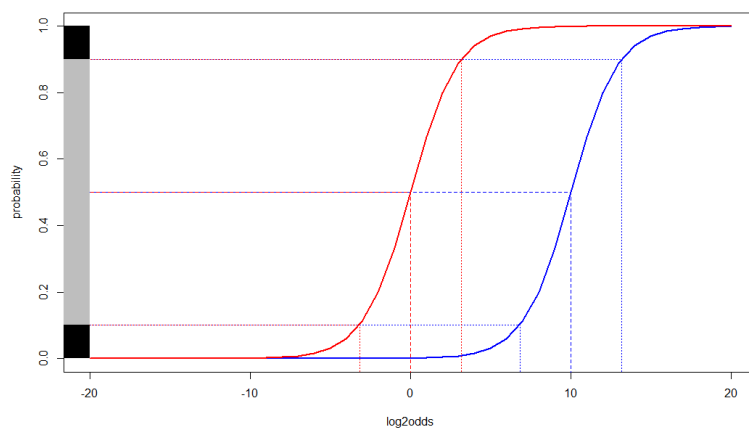

**Supplement Figure 1.** The relationship between Pathway Activity score, calculated as  $\log_2\text{odds}$  (x-axis) and *probability* (y-axis). The direct output of the model calculation is the probability ( $p$ ) that the transcription factor is active; this can be used to calculate the odds  $\{\text{odds}=p/(1-p)\}$  and the  $\log_2\text{odds}$  pathway score.

A

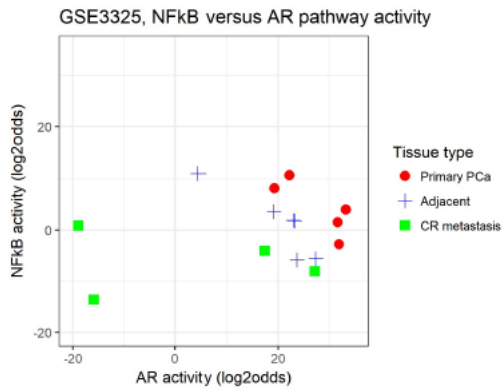

B

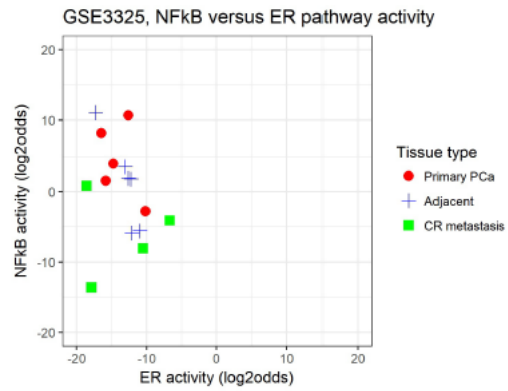

C

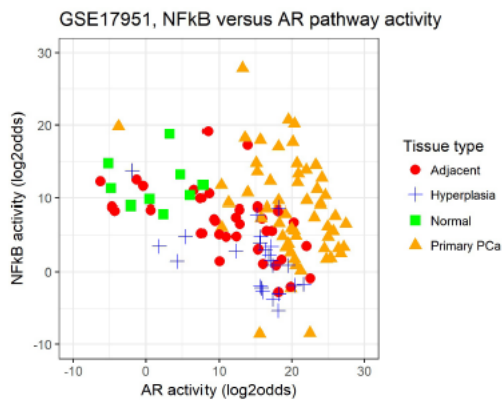

D

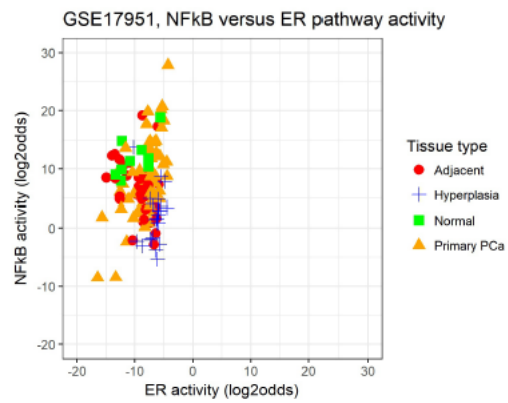

E

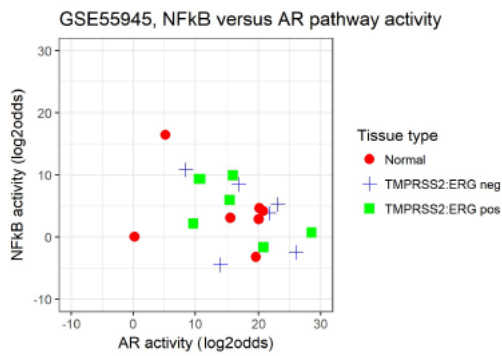

F

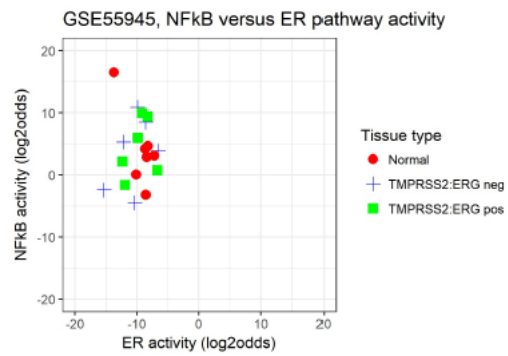

### Supplement Figure 2.

Correlation plots for NFkB pathway activity versus AR pathway activity (A,C,E) and ER pathway activity (B,D,F) in cancer-adjacent tissue, benign hyperplasia and primary prostate cancer samples from GEO datasets GSE3325, GSE17951, GSE55945

**Supplement Table 1****QC results on GEO datasets**

| Dataset  | Figure | # of samples analyzed | # QC passed | # QC failed | ID QC failed samples                                                                                                                                                                                                                                                                                                          |
|----------|--------|-----------------------|-------------|-------------|-------------------------------------------------------------------------------------------------------------------------------------------------------------------------------------------------------------------------------------------------------------------------------------------------------------------------------|
| GSE7553  | 1A     | 19                    | 19          | 0           |                                                                                                                                                                                                                                                                                                                               |
| GSE39612 | 1B     | 66                    | 66          | 0           |                                                                                                                                                                                                                                                                                                                               |
| GSE29316 | 1C     | 6                     | 6           | 0           |                                                                                                                                                                                                                                                                                                                               |
| GSE37418 | 1D     | 76                    | 61          | 15          | GSM918579, GSM918580, GSM918581, GSM918585, GSM918599, GSM918617, GSM918623, GSM918628, GSM918631, GSM918632, GSM918635, GSM918648, GSM918649, GSM918652, GSM918653                                                                                                                                                           |
| GSE49243 | 1E     | 73                    | 71          | 2           | GSM1195809, GSM1195844                                                                                                                                                                                                                                                                                                        |
| GSE17708 | 2A     | 6                     | 6           | 0           |                                                                                                                                                                                                                                                                                                                               |
| GSE43700 | 2B     | 8                     | 8           | 0           |                                                                                                                                                                                                                                                                                                                               |
| GSE7568  | 2C     | 15                    | 15          | 0           |                                                                                                                                                                                                                                                                                                                               |
| GSE6653  | 2D     | 8                     | 8           | 0           |                                                                                                                                                                                                                                                                                                                               |
| GSE14491 | 2E     | 16                    | 16          | 0           |                                                                                                                                                                                                                                                                                                                               |
| GSE59771 | 2F     | 4                     | 4           | 0           |                                                                                                                                                                                                                                                                                                                               |
| GSE84500 | 2G     | 24                    | 24          | 0           |                                                                                                                                                                                                                                                                                                                               |
| GSE12195 | 3A     | 23                    | 23          | 0           |                                                                                                                                                                                                                                                                                                                               |
| GSE12195 | 3B     | 113                   | 111         | 2           | GSM476262, GSM476276                                                                                                                                                                                                                                                                                                          |
| GSE72642 | 3C     | 18                    | 18          | 0           |                                                                                                                                                                                                                                                                                                                               |
| GSE58096 | 3D     | 9                     | 9           | 0           |                                                                                                                                                                                                                                                                                                                               |
| GSE60028 | 3E     | 47                    | 39          | 8           | GSM1463949, GSM1463953, GSM1463962, GSM1463966, GSM1463974, GSM1463981, GSM1463983, GSM1463984                                                                                                                                                                                                                                |
| GSE43657 | 3F     | 6                     | 6           | 0           |                                                                                                                                                                                                                                                                                                                               |
| GSE38010 | 3G     | 5                     | 4           | 1           | GSM931818                                                                                                                                                                                                                                                                                                                     |
| GSE7868  | 4A     | 9                     | 9           | 0           |                                                                                                                                                                                                                                                                                                                               |
| GSE7708  | 4B     | 8                     | 8           | 0           |                                                                                                                                                                                                                                                                                                                               |
| GSE21887 | 4C     | 12                    | 12          | 0           |                                                                                                                                                                                                                                                                                                                               |
| GSE33316 | 4D     | 10                    | 10          | 0           |                                                                                                                                                                                                                                                                                                                               |
| GSE32982 | 4E     | 9                     | 9           | 0           |                                                                                                                                                                                                                                                                                                                               |
| GSE34620 | 5A     | 117                   | 115         | 2           | GSM852014, GSM852036                                                                                                                                                                                                                                                                                                          |
| GSE87385 | 5B     | 4                     | 4           | 0           |                                                                                                                                                                                                                                                                                                                               |
| GSE66354 | 5C     | 55                    | 53          | 2           | GSM1620217, GSM1620239                                                                                                                                                                                                                                                                                                        |
| GSE17951 | 6A     | 154                   | 125         | 29          | GSM449148, GSM449211, GSM449261, GSM449266, GSM449278, GSM449256, GSM449258, GSM449270, GSM449273, GSM449275, GSM449281, GSM449286, GSM449287, GSM449288, GSM449238, GSM449242, GSM449295, GSM449300, GSM449175, GSM449180, GSM449221, GSM449229, GSM449231, GSM449232, GSM449233, GSM449237, GSM449248, GSM449263, GSM449265 |
| GSE55945 | 6B     | 19                    | 19          | 0           |                                                                                                                                                                                                                                                                                                                               |
| GSE45016 | 6C     | 11                    | 10          | 1           | GSM1095880                                                                                                                                                                                                                                                                                                                    |
| GSE3325  | 6D/6F  | 15                    | 15          | 0           |                                                                                                                                                                                                                                                                                                                               |
| GSE28403 | 6E     | 13                    | 13          | 0           |                                                                                                                                                                                                                                                                                                                               |

### Supplement List with GEO datasets used.

Numbers/GEO links of datasets from the GEO database that were used for model calibration and validation purposes, and associated publications.

#### Figure 2

GSE7553, <https://www.ncbi.nlm.nih.gov/geo/query/acc.cgi?acc=GSE7553>. Riker AI, Enkemann SA, Fodstad O, Liu S, Ren S, Morris C, Xi Y, Howell P, Metge B, Samant RS, Shevde LA, Li W, Eschrich S, Daud A, Ju J, Matta J. The gene expression profiles of primary and metastatic melanoma yields a transition point of tumor progression and metastasis. *BMC Med Genomics*. 2008 Apr 28;1:13.

GSE39612, <https://www.ncbi.nlm.nih.gov/geo/query/acc.cgi?acc=GSE39612>. Harms PW, Patel RM, Verhaegen ME, Giordano TJ, Nash KT, Johnson CN, Daignault S, Thomas DG, Gudjonsson JE, Elder JT, Dlugosz AA, Johnson TM, Fullen DR, Bichakjian CK. Distinct gene expression profiles of viral- and nonviral-associated merkel cell carcinoma revealed by transcriptome analysis. *J Invest Dermatol*. 2013 Apr;133(4):936-45.

GSE29316, <https://www.ncbi.nlm.nih.gov/geo/query/acc.cgi?acc=GSE29316>. Chen W, Tang T, Eastham-Ander-son J, Dunlap D et al. Canonical hedgehog signaling augments tumor angiogenesis by induction of VEGF-A in stromal perivascular cells. *Proc Natl Acad Sci U S A* 2011 Jun 7;108(23):9589-94

GSE49243, <https://www.ncbi.nlm.nih.gov/geo/query/acc.cgi?acc=GSE49243>. Pöschl J, Stark S, Neumann P, Gröbner S et al. Genomic and transcriptomic analyses match medulloblastoma mouse models to their human counterparts. *Acta Neuropathol* 2014 Jul;128(1):123-36

GSE37418, <https://www.ncbi.nlm.nih.gov/geo/query/acc.cgi?acc=GSE37418>. GSE49243, <https://www.ncbi.nlm.nih.gov/geo/query/acc.cgi?acc=GSE49243>. Robinson G, Parker M, Kranenburg TA, Lu C et al. Novel mutations target distinct subgroups of medulloblastoma. *Nature* 2012 Aug 2;488(7409):43-8

#### Figure 3

GSE17708, <https://www.ncbi.nlm.nih.gov/geo/query/acc.cgi?acc=GSE17708>. Sartor MA, Mahavisno V, Keshamouni VG, Cavalcoli J et al. ConceptGen: a gene set enrichment and gene set relation mapping tool. *Bioinformatics* 2010 Feb 15;26(4):456-63.

GSE43700, <https://www.ncbi.nlm.nih.gov/geo/query/acc.cgi?acc=GSE43700>. Teles RM, Graeber TG, Krutzik SR, Montoya D et al. Type I interferon suppresses type II interferon-triggered human anti-mycobacterial responses. *Science* 2013 Mar 22;339(6126):1448-53

GSE7568, <https://www.ncbi.nlm.nih.gov/geo/query/acc.cgi?acc=GSE7568>. Gratchev A, Kzhyshkowska J, Kanno-kadan S, Ochsenreiter M et al. Activation of a TGF-beta-specific multistep gene expression program in mature macrophages requires glucocorticoid-mediated surface expression of TGF-beta receptor II. *J Immunol* 2008 May 15;180(10):6553-65

GSE6653, <https://www.ncbi.nlm.nih.gov/geo/query/acc.cgi?acc=GSE6653>. Qin H, Chan MW, Liyanarachchi S, Balch C et al. An integrative ChIP-chip and gene expression profiling to model SMAD regulatory modules. *BMC Syst Biol* 2009 Jul 17;3:73

GSE14491, <https://www.ncbi.nlm.nih.gov/geo/query/acc.cgi?acc=GSE14491>. Adorno M, Cordenonsi M, Montagner M, Dupont S et al. A Mutant-p53/Smad complex opposes p63 to empower TGFbeta-induced metastasis. *Cell* 2009 Apr 3;137(1):87-98

GSE59771, <https://www.ncbi.nlm.nih.gov/geo/query/acc.cgi?acc=GSE59771>. No associated publication available

GSE84500, <https://www.ncbi.nlm.nih.gov/geo/query/acc.cgi?acc=GSE84500>. van Zoelen EJ, Duarte I, Hendriks JM, van der Woning SP. TGFβ-induced switch from adipogenic to osteogenic differentiation of human mesenchymal stem cells: identification of drug targets for prevention of fat cell differentiation. *Stem Cell Res Ther* 2016 Aug 26;7(1):123

#### Figure 4

GSE12195, <https://www.ncbi.nlm.nih.gov/geo/query/acc.cgi?acc=GSE12195>. Compagno M, Lim WK, Grunn A, Nandula SV et al. Mutations of multiple genes cause deregulation of NF-kappaB in diffuse large B-cell lymphoma. *Nature* 2009 Jun 4;459(7247):717-21.

GSE72642, <https://www.ncbi.nlm.nih.gov/geo/query/acc.cgi?acc=GSE72642>. Du X, Tang Y, Xu H, Lit L et al. Genomic profiles for human peripheral blood T cells, B cells, natural killer cells, monocytes, and polymorphonuclear cells: comparisons to ischemic stroke, migraine, and Tourette syndrome. *Genomics* 2006 Jun;87(6):693-703

GSE58096, <https://www.ncbi.nlm.nih.gov/geo/query/acc.cgi?acc=GSE58096>. Leu JS, Chen ML, Chang SY, Yu SL et al. SP110b Controls Host Immunity and Susceptibility to Tuberculosis. *Am J Respir Crit Care Med* 2017 Feb 1;195(3):369-382.

GSE60028, <https://www.ncbi.nlm.nih.gov/geo/query/acc.cgi?acc=GSE60028>. Dhingra N, Shemer A, Correa da Rosa J, Rozenblit M, Fuentes-Duculan J, Gittler JK, Finney R, Czarnowicki T, Zheng X, Xu H, Estrada YD, Cardinale

I, Suárez-Fariñas M, Krueger JG, Guttman-Yassky E. Molecular profiling of contact dermatitis skin identifies allergen-dependent differences in immune response. *J Allergy Clin Immunol*. 2014 Aug;134(2):362-72) GSE43657, <https://www.ncbi.nlm.nih.gov/geo/query/acc.cgi?acc=GSE43657>. Wang H, Zhang Y, Du Y. Ovarian and breast cancer spheres are similar in transcriptomic features and sensitive to fenretinide. *Biomed Res Int* 2013;2013:510905 GSE38010, <https://www.ncbi.nlm.nih.gov/geo/query/acc.cgi?acc=GSE38010>. Han MH, Lundgren DH, Jaiswal S, Chao M et al. Janus-like opposing roles of CD47 in autoimmune brain inflammation in humans and mice. *J Exp Med* 2012 Jul 2;209(7):1325-34.

#### Figure 5

GSE7868, <https://www.ncbi.nlm.nih.gov/geo/query/acc.cgi?acc=GSE7868>. Wang Q, Li W, Liu XS, Carroll JS et al. A hierarchical network of transcription factors governs androgen receptor-dependent prostate cancer growth. *Mol Cell* 2007 Aug 3;27(3):380-92. GSE7708, <https://www.ncbi.nlm.nih.gov/geo/query/acc.cgi?acc=GSE7708>. Nickols NG, Dervan PB. Suppression of androgen receptor-mediated gene expression by a sequence-specific DNA-binding polyamide. *Proc Natl Acad Sci U S A* 2007 Jun 19;104(25):10418-23. GSE21887, <https://www.ncbi.nlm.nih.gov/geo/query/acc.cgi?acc=GSE21887>. Terada N, Shimizu Y, Kamba T, Inoue T et al. Identification of EP4 as a potential target for the treatment of castration-resistant prostate cancer using a novel xenograft model. *Cancer Res* 2010 Feb 15;70(4):1606-15. GSE33316, <https://www.ncbi.nlm.nih.gov/geo/query/acc.cgi?acc=GSE33316>. Sun Y, Wang BE, Leong KG, Yue P et al. Androgen deprivation causes epithelial-mesenchymal transition in the prostate: implications for androgen-deprivation therapy. *Cancer Res* 2012 Jan 15;72(2):527-36 GSE32982, <https://www.ncbi.nlm.nih.gov/geo/query/acc.cgi?acc=GSE32982>. Vaarala MH, Hirvikoski P, Kauppila S, Paavonen TK. Identification of androgen-regulated genes in human prostate. *Mol Med Rep* 2012 Sep;6(3):466-72.

#### Figure 6

GSE34620, <https://www.ncbi.nlm.nih.gov/geo/query/acc.cgi?acc=GSE34620>. Postel-Vinay S, Véron AS, Tirode F, Pierron G et al. Common variants near TARDBP and EGR2 are associated with susceptibility to Ewing sarcoma. *Nat Genet* 2012 Feb 12;44(3):323-7 GSE87385, <https://www.ncbi.nlm.nih.gov/geo/query/acc.cgi?acc=GSE87385>. Ferraiuolo L, Meyer K, Sherwood TW, Vick J et al. Oligodendrocytes contribute to motor neuron death in ALS via SOD1-dependent mechanism. *Proc Natl Acad Sci U S A* 2016 Oct 18;113(42):E6496-E6505 GSE66354, <https://www.ncbi.nlm.nih.gov/geo/query/acc.cgi?acc=GSE66354>. Griesinger AM, Josephson RJ, Donson AM, Mulcahy Levy JM et al. Interleukin-6/STAT3 Pathway Signaling Drives an Inflammatory Phenotype in Group A Ependymoma. *Cancer Immunol Res* 2015 Oct;3(10):1165-74.

#### Figure 7

GSE17951, <https://www.ncbi.nlm.nih.gov/geo/query/acc.cgi?acc=GSE17951>. Wang Y, Xia XQ, Jia Z, Sawyers A et al. In silico estimates of tissue components in surgical samples based on expression profiling data. *Cancer Res* 2010 Aug 15;70(16):6448-55. GSE55945, <https://www.ncbi.nlm.nih.gov/geo/query/acc.cgi?acc=GSE55945>. Arredouani MS, Lu B, Bhasin M, El-janne M et al. Identification of the transcription factor single-minded homologue 2 as a potential biomarker and immunotherapy target in prostate cancer. *Clin Cancer Res* 2009 Sep 15;15(18):5794-802 GSE45016, <https://www.ncbi.nlm.nih.gov/geo/query/acc.cgi?acc=GSE45016>. Satake H, Tamura K, Furihata M, Anchi T et al. The ubiquitin-like molecule interferon-stimulated gene 15 is overexpressed in human prostate cancer. *Oncol Rep* 2010 Jan;23(1):11-6 GSE28403, <https://www.ncbi.nlm.nih.gov/geo/query/acc.cgi?acc=GSE28403>. Vainio P, Wolf M, Edgren H, He T et al. Integrative genomic, transcriptomic, and RNAi analysis indicates a potential oncogenic role for FAM110B in castration-resistant prostate cancer. *Prostate* 2012 May 15;72(7):789-802 GSE3325, <https://www.ncbi.nlm.nih.gov/geo/query/acc.cgi?acc=GSE3325>. Varambally S, Yu J, Laxman B, Rhodes DR et al. Integrative genomic and proteomic analysis of prostate cancer reveals signatures of metastatic progression. *Cancer Cell* 2005 Nov;8(5):393-406

## **Supplemental Reference-based selection of pathway model target genes**

### **Pathway target gene selection**

Potential target genes were selected based on literature (PubMed), and scored according to available target gene evidence:

1. The gene promoter/enhancer region contains a response (enhancer) element motif.
2. The pathway-associated transcription factor (TF) (differentially) binds to the promoter/enhancer region of the gene in question, e.g. demonstrated by EMSA (electrophoretic mobility shift assay) or CHIP (chromatin immunoprecipitation).
3. The enhancer/promoter binding motif is proven to be functional, e.g., by means of a transient transfection assay in which the specific motif is linked to a reporter gene.
4. The gene is differentially transcribed when the pathway is active, demonstrated by for example fold enrichment of the mRNA of the gene as measured by real time PCR, or expression microarray.
5. The gene is differentially transcribed when the pathway is active in the presence of cycloheximide (preventing indirect translated protein-mediated effects)
6. Transcriptional regulation of the target gene is as specific as possible for the pathway of interest.

**AR, TGFβ, HH, and NFκB pathway target gene selection, Affymetrix U133 Plus2.0 probeset lists, references for target gene selection**

***1A. AR pathway target gene probeset list***

| Gene    | Probeset     | Gene   | Probeset    |
|---------|--------------|--------|-------------|
| ABCC4   | 1554918_a_at | KLK3   | 204582_s_at |
|         | 1555039_a_at |        | 204583_x_at |
|         | 203196_at    | LCP1   | 208885_at   |
| APP     | 200602_at    | LRIG1  | 211596_s_at |
|         | 211277_x_at  |        | 238339_x_at |
|         | 214953_s_at  | NDRG1  | 200632_s_at |
| AR      | 211110_s_at  | NKX3-1 | 209706_at   |
|         | 211621_at    |        | 211497_x_at |
|         | 226192_at    |        | 211498_s_at |
| CDKN1A  | 202284_s_at  | NTS    | 206291_at   |
| CREB3L4 | 226455_at    | PLAU   | 205479_s_at |
| DHCR24  | 200862_at    |        | 211668_s_at |
| EAF2    | 1568672_at   | PMEPA1 | 217875_s_at |
|         | 1568673_s_at |        | 222449_at   |

|         |             |         |              |
|---------|-------------|---------|--------------|
|         | 219551_at   |         | 222450_at    |
| ELL2    | 214446_at   | PPAP2A  | 209147_s_at  |
|         | 226099_at   |         | 210946_at    |
|         | 226982_at   | PRKACB  | 202741_at    |
| FGF8    | 208449_s_at |         | 202742_s_at  |
| FKBP5   | 204560_at   |         | 235780_at    |
|         | 224840_at   | PTPN1   | 202716_at    |
|         | 224856_at   |         | 217686_at    |
| GUCY1A3 | 221942_s_at | SGK1    | 201739_at    |
|         | 227235_at   | TACC2   | 1570025_at   |
|         | 229530_at   |         | 1570546_a_at |
|         | 239580_at   |         | 202289_s_at  |
| IGF1    | 209540_at   |         | 211382_s_at  |
| IGF1    | 209541_at   | TMPRSS2 | 1570433_at   |
|         | 209542_x_at |         | 205102_at    |
|         | 211577_s_at |         | 211689_s_at  |
|         | KLK2        |         | 1555545_at   |
| KLK2    | 209854_s_at | UGT2B15 | 207392_x_at  |
|         | 209855_s_at |         | 216687_x_at  |
|         | 210339_s_at |         |              |



## 1B. AR target gene literature evidence and associated references

| # | Gene Name | AR binds to regulatory region, Experiment type [References]                                                                                              | ARE motif in regulatory region, Motif type[Reference]                                                                                                                                                                                                                                                                                                                         | mRNA transcription Experiment type [References]                                                                                                                                                                                                                                          | Other                                  |
|---|-----------|----------------------------------------------------------------------------------------------------------------------------------------------------------|-------------------------------------------------------------------------------------------------------------------------------------------------------------------------------------------------------------------------------------------------------------------------------------------------------------------------------------------------------------------------------|------------------------------------------------------------------------------------------------------------------------------------------------------------------------------------------------------------------------------------------------------------------------------------------|----------------------------------------|
| 1 | KLK3      | AR CHIP/PCR [1]–[4]<br>AR CHIP/seq [5], [6] <sup>ARmo/hi</sup> , [2]<br>literature [7]<br>AR database[8]                                                 | confirmed experimentally, upstr. TSS:<br>- AG <u>A</u> ACAgcaAGT <u>G</u> GCT[7], [9] <sup>lit</sup><br>- AG <u>G</u> ACAgtaAG <u>C</u> AAG[7] <sup>lit</sup><br>- GG <u>A</u> ACAtatTGTATC[7],[9] <sup>lit</sup><br>- AG <u>A</u> TCAaagAG <u>A</u> TAA[7] <sup>lit</sup><br>- GGATCAgggAGTCTC[9] <sup>lit</sup><br>NI [3] <sup>Luc</sup> , AR database[8] <sup>4/2mut</sup> | PCR [5], [5] <sup>PT</sup> , [10], [11] <sup>up ctr/nt AR siRNA</sup><br>PCR [12] <sup>xen</sup><br>microarray [6] <sup>lit</sup> , [1], [2], [7], [9], [10]<br>Northern blot [7]<br>RNA PolII CHIP/PCR [1] [3]<br>AR database[8] <sup>19up/1down</sup>                                  | Forkhead,<br>GATA, and<br>OCT motif[3] |
| 2 | KLK2      | AR CHIP/PCR [1]<br>AR CHIP/CHIP [2]<br>AR CHIP/seq [5]<br>literature [7]<br>AR database[8]                                                               | confirmed experimentally, upstr. TSS:<br>- GG <u>A</u> ACAgcaAGT <u>G</u> GCT [7] [9] <sup>lit</sup><br>- tgggGGAACAtatTGTATTtatt[13] <sup>CAT/mut</sup><br>AR database[8] <sup>1/1mut</sup>                                                                                                                                                                                  | PCR [5], [5] <sup>PT</sup> , [12] <sup>xenogr.</sup><br>microarray [1], [7], [9], [10]<br>RNA PolII CHIP/PCR [1]<br>AR database[8] <sup>12up</sup>                                                                                                                                       |                                        |
| 2 | TMPRSS2   | AR CHIP/PCR[1], [3], [4]<br>AR CHIP/CHIP [3]<br>AR CHIP/seq [2]<br>AR database[8] <sup>3</sup>                                                           | confirmed experimentally, upstr. TSS:<br>A <u>C</u> AACA 8 TGTCTT [3] <sup>Luc/mut</sup><br>putative: up. TSS: AG <u>C</u> AGAttcTGGTCT [7]                                                                                                                                                                                                                                   | PCR [5], [5] <sup>PT</sup> , [3]<br>microarray [1], [2] <sup>&lt;5h</sup> , [3], [7]<br>Northern blot [7]<br>RNA PolII CHIP/PCR [1], [3]<br>AR database[8] <sup>10up/1down</sup>                                                                                                         | GATA and<br>OCT motif[3]               |
| 2 | FKBP5     | AR CHIP/PCR[4]<br>AR CHIP/PCR [14] <sup>mice</sup><br>AR CHIP/CHIP[15] <sup>HPr1AR</sup><br>AR CHIP/seq [5] [2] [6] <sup>ARmo/hi</sup><br>AR database[8] | confirmed experimentally, downstr. TSS:<br>AGAACAgggTGTCT [14] <sup>Luc/mut</sup>                                                                                                                                                                                                                                                                                             | PCR [5],[10], [15] <sup>HPr1AR</sup><br>microarray [6] <sup>lit</sup> , [1], [2] <sup>&lt;5h</sup> , [7],<br>microarray [9] <sup>up 10nM/down 1nM</sup> ,<br>microarray [10] <sup>PT</sup> , [15] <sup>HPr1AR</sup><br>RNA PolII CHIP/PCR [2]<br>immunohistochemistry [10] <sup>PT</sup> |                                        |

| #  | Gene Name | AR binds to regulatory region, Experiment type [References]                                                    | ARE motif in regulatory region, Motif type[Reference]                                                                                                 | mRNA transcription Experiment type [References]                                                                                                                                           | Other                                                 |
|----|-----------|----------------------------------------------------------------------------------------------------------------|-------------------------------------------------------------------------------------------------------------------------------------------------------|-------------------------------------------------------------------------------------------------------------------------------------------------------------------------------------------|-------------------------------------------------------|
| 5  | GUCY1A3   | AR CHIP/PCR [16]<br>AR CHIP/seq [6] <sup>ARmo/hi</sup> , [2]<br>AR database[8]                                 | confirmed experimentally: downtsr. TSS:<br>...GTACAAATCTCCT...[16] <sup>Luc</sup>                                                                     | AR database[8] <sup>14up</sup><br>PCR/western blot[16]<br>immunohistochemistry [16] <sup>PT</sup><br>microarray [6] <sup>lit</sup> , [2], [7], [9], [10]<br>AR database[8] <sup>5up</sup> | expression increases with PC stage [16] <sup>PT</sup> |
| 6  | ABCC4     | AR CHIP/PCR [17]<br>AR CHIP/seq [6] <sup>ARmo</sup> , [2]                                                      | putative: AGACCAgccTGAGCA [18]                                                                                                                        | PCR [17], [19];<br>microarray [6] <sup>lit</sup> , [1], [2], [7]<br>RNA PolII CHIP/PCR [2]<br>AR database[8] <sup>5up</sup><br>western blot [19]                                          |                                                       |
| 7  | NDRG1     | AR CHIP/CHIP [15] <sup>HPr1AR</sup><br>AR CHIP/seq [5], [6] <sup>ARhi</sup> , [2]<br>AR database[8]            | putative, uptsr. TSS:<br>- TGATT AaacTGTTCT [7]<br>- AATACaccTGTTCC [9]<br>- AATAGAttgTGTATT[9]                                                       | PCR [5], [1], [9], [15] <sup>HPr1AR</sup><br>microarray [6] <sup>lit</sup> , [2], [7], [9], [10]<br>Northern blot [9]<br>RNA PolII CHIP/PCR [2]<br>AR database[8] <sup>10up</sup>         |                                                       |
| 8  | IGF1      | AR CHIP/PCR [4], [20]                                                                                          | confirmed experimentally, uptsr. TSS:<br>ATATCTTATTCCTCTTTG,<br>GGCACATAGTAGAGCTCA,<br>or half sites, [8] <sup>lit</sup> , [20] <sup>Luc/EMSA</sup>   | PCR [20]<br>microarray [1] <sup>3h down/6-48h up</sup><br>AR database[8] <sup>2up</sup>                                                                                                   |                                                       |
| 9  | CDKN1A    | AR CHIP/PCR [4]<br>literature [7]<br>AR database[8]                                                            | confirmed experimentally, uptsr. TSS:<br>AGCACGcgaGGTTCC [21] <sup>EMSA/mut</sup> ,<br>[7] <sup>lit</sup> , [22] <sup>Luc*</sup> , [8] <sup>lit</sup> | Northern/Western blot [21]<br>AR database[8] <sup>4up/2down</sup>                                                                                                                         | SP1 motif binds [22]                                  |
| 10 | SGK1      | AR CHIP/CHIP [15] <sup>HPr1AR</sup><br>AR CHIP/seq [6] <sup>ARmo/hi</sup> , [2]<br>AR database[8] <sup>5</sup> | putative,<br>uptsr. TSS: GGCTATcccTGTTCT [8] <sup>lit</sup>                                                                                           | PCR/microarray [15] <sup>HPr1AR</sup><br>microarray [6] <sup>lit</sup> , [1],[2] <sup>&lt;5h</sup> , [7]<br>RNA PolII CHIP/PCR [2];<br>AR database[8] <sup>5up</sup>                      |                                                       |
| 11 | DHCR24    | AR CHIP/CHIP [15] <sup>HPr1AR</sup>                                                                            | putative,                                                                                                                                             | Microarray [1], [2], [7], [10]                                                                                                                                                            |                                                       |

| #  | Gene Name   | AR binds to regulatory region, Experiment type [References]                                  | ARE motif in regulatory region, Motif type[Reference]                                                                                                                            | mRNA transcription Experiment type [References]                                                                                                                              | Other              |
|----|-------------|----------------------------------------------------------------------------------------------|----------------------------------------------------------------------------------------------------------------------------------------------------------------------------------|------------------------------------------------------------------------------------------------------------------------------------------------------------------------------|--------------------|
|    |             | AR CHIP/seq [2]<br>AR database[8]                                                            | uptsr. TSS: AGAACAtcct <b>ATTCC</b> [7]                                                                                                                                          | Northern blot [7]<br>AR database[8] <sup>5up</sup>                                                                                                                           |                    |
| 12 | NKX3_1      | AR CHIP/seq [2]<br>AR database[8]                                                            | putative,<br>uptsr. TSS: AGAAC <b>CattTGATGT</b> [7]                                                                                                                             | microarray [1], [7], [9]<br>AR database[8] <sup>11up</sup>                                                                                                                   |                    |
| 13 | APP         | AR CHIP/PCR [23]<br>AR CHIP/CHIP [23]                                                        | confirmed experimentally,<br>- promoter:<br>AGAACAtgaAGCTAC [23] <sup>Luc/mut</sup><br>- intron 1:<br>GGTACTgacTGATT [23] <sup>Luc</sup>                                         | PCR [23] <sup>up&gt;12 h</sup><br>microarray [10] <sup>down</sup><br>PolII CHIP/PCR[23]<br>AcH3 CHIP/PCR[23]<br>AcH3 CHIP/CHIP[23]<br>PCR [11] <sup>up ctr/nt AR siRNA</sup> | Cancer marker [23] |
| 14 | AR          | literature [7]                                                                               | confirmed experimentally:<br>-exon D: <b>CTTCT</b> gaa <b>TGTCCT</b> [7] <sup>lit</sup><br>-exon E: AGTACTcct <b>GGATGG</b> [7] <sup>lit</sup><br>AR database[8] <sup>3lit</sup> | AR database[8] <sup>5up/8down</sup><br>microarray[1] <sup>3h up/6-48h down</sup> , [2] <sup>down</sup> , [7]<br>PCR [15] <sup>HPr1AR</sup>                                   |                    |
| 15 | PMEPA1      | AR CHIP/CHIP [15] <sup>HPr1AR</sup> , [6] <sup>ARmo/hi</sup><br>AR database [8] <sup>2</sup> | putative,<br>uptsr. TSS: <b>TGAAG</b> AatgTGTCT [7]                                                                                                                              | microarray [6] <sup>lit</sup> , [2] <sup>&lt;5h</sup> , [7],<br>AR database[8] <sup>7up/2down</sup>                                                                          |                    |
| 16 | LCP1        | AR CHIP/seq [6] <sup>ARmo/hi</sup> , [2]<br>AR database [8]                                  |                                                                                                                                                                                  | microarray [6] <sup>lit</sup> , [2], [9]<br>RNA PolII CHIP/PCR [2]<br>AR database[8] <sup>4up</sup>                                                                          |                    |
| 17 | LRIG1       | AR CHIP/seq [2], [6] <sup>ARmo/hi</sup>                                                      |                                                                                                                                                                                  | microarray [6] <sup>lit</sup> , [1], [2], [11] <sup>ctr</sup><br>AR database[8] <sup>2up</sup>                                                                               |                    |
| 18 | PTPN1       | AR CHIP/seq [2]                                                                              |                                                                                                                                                                                  | microarray [1] <sup>down</sup> , [2] <sup>down</sup> , [10] <sup>down</sup><br>RNA PolII CHIP/PCR [2]                                                                        |                    |
| 20 | ELL2        | AR CHIP/CHIP [15] <sup>HPr1AR</sup>                                                          |                                                                                                                                                                                  | PCR [15] <sup>HPr1AR</sup> , [12] <sup>xen</sup> , [14] <sup>mice</sup><br>microarray [1], [2] <sup>&lt;5h</sup> , [7], [9], [10]<br>AR database [8] <sup>6up</sup>          |                    |
| 19 | UGT2B1<br>5 | AR database[8]                                                                               |                                                                                                                                                                                  | microarray [10] <sup>down</sup><br>AR database [8] <sup>1up/9down</sup>                                                                                                      |                    |

| #  | Gene Name | AR binds to regulatory region, Experiment type [References] | ARE motif in regulatory region, Motif type[Reference] | mRNA transcription Experiment type [References]                                                                                                                                  | Other              |
|----|-----------|-------------------------------------------------------------|-------------------------------------------------------|----------------------------------------------------------------------------------------------------------------------------------------------------------------------------------|--------------------|
| 21 | PPAP2A    | AR CHIP/seq [6] <sup>ARmo/hi</sup>                          |                                                       | microarray [6] <sup>lit</sup> , [1] <sup>3h down/6-48h up</sup> , [2], [7]<br>AR database [8] <sup>3up</sup>                                                                     |                    |
| 22 | TACC2     | AR CHIP/seq [5], [6] <sup>ARhi</sup> , [2]                  |                                                       | microarray [6] <sup>lit</sup> , [2]<br>RNA PolII CHIP/PCR [2]                                                                                                                    |                    |
| 23 | EAF2      | AR CHIP/seq [2]                                             |                                                       | microarray [1], [2] <sup>&lt;5h</sup><br>RNA PolII CHIP/seq [2]                                                                                                                  |                    |
| 24 | FGF8      | AR database [8]                                             | putative:<br>gcaGGGCCTggcTGTGCTgct [8]                | AR database [8] <sup>2up</sup>                                                                                                                                                   |                    |
| 25 | PLAU      | AR CAT assay [24]<br>AR database [8]                        |                                                       | PCR/microarray [15] <sup>HPr1AR, down</sup><br>northern blot [24] <sup>PC3-AR down, CHX</sup><br>western blot [24] <sup>PC3-AR down</sup><br>AR database [8] <sup>5down</sup>    |                    |
| 26 | CREB3L4   |                                                             |                                                       | microarray [1] <sup>3-6h down/12-48h up</sup><br>Northern blot [25] <sup>up, chx down, PT</sup><br>Immunostaining [25] <sup>PT up</sup> , [26]<br>AR database [8] <sup>1up</sup> | Indirect gene [25] |
| 27 | PRKACB    |                                                             |                                                       | PCR/ microarray [27],<br>immunoblot [27], [27] <sup>PT</sup><br>AR database [8] <sup>1up</sup>                                                                                   |                    |
| 28 | NTS       |                                                             |                                                       | Northern blot [28] <sup>down</sup><br>microarray [2] <sup>down</sup>                                                                                                             |                    |
| NA | DRG1      |                                                             |                                                       |                                                                                                                                                                                  |                    |

(PT): measured in primary tumor; (up): up regulated- only indicated if needed; (down): down regulated; (#): number of references cited;

(#h) exposure time; (#nM) concentration; (nt AR siRNA): not differentially expressed when AR is silenced;

(ctr): in control siRNA experiment; (CHX): in cycloheximide

(ARmo): LNCaP cell line moderately overexpressing AR; (AR /hi): LNCaP cell line highly one\overexpressing AR; (PC3-AR) PC3 cell line expressing AR;

(lit): from analysis of public microarray data;

(HPr1AR): normal PC cell line overexpressing AR; (xen) measured in xenograft; (mice) measured in mice;  
TSS: Transcription site start



## 2A. TGFβ pathway target gene probeset list

| Gene        | Probeset     | Gene     | Probeset    |
|-------------|--------------|----------|-------------|
| ANGPTL4     | 223333_s_at  | PDGFB    | 204200_s_at |
|             | 221009_s_at  |          | 216061_x_at |
| CDC42EP3    | 209286_at    |          | 217112_at   |
|             | 209288_s_at  |          | 217430_x_at |
|             | 225685_at    |          | PTHLH       |
| 209287_s_at | 206300_s_at  |          |             |
| CDKN1A      | 202284_s_at  | SERPINE1 | 1556773_at  |
|             | 1555186_at   |          | 211756_at   |
| CDKN2B      | 236313_at    |          | 202627_s_at |
|             | 207530_s_at  |          | 1568765_at  |
| CTGF        | 209101_at    |          | 202628_s_at |
| GADD45A     | 203725_at    | SGK1     | 201739_at   |
| GADD45B     | 207574_s_at  | SKIL     | 206675_s_at |
|             | 209305_s_at  |          | 225227_at   |
|             | 209304_x_at  |          | 215889_at   |
| HMGA2       | 208025_s_at  | SMAD4    | 202526_at   |
|             | 1567224_at   |          | 202527_s_at |
|             | 1568287_at   |          | 1565703_at  |
|             | 1558683_a_at |          | 235725_at   |
|             | 1561633_at   | SMAD5    | 225223_at   |
|             | 1559891_at   |          | 235451_at   |
|             | 1558682_at   |          | 225219_at   |
| ID1         | 208937_s_at  |          | 205187_at   |
| IL11        | 206924_at    |          | 205188_s_at |
|             | 206926_s_at  | SMAD6    | 207069_s_at |
| INPP5D      | 203331_s_at  |          | 209886_s_at |
|             | 1568943_at   | SMAD7    | 204790_at   |
|             | 203332_s_at  | SNAI1    | 219480_at   |
| JUNB        | 201473_at    | SNAI2    | 213139_at   |
| MMP2        | 1566678_at   |          |             |
|             | 201069_at    | VEGFA    | 210513_s_at |
| MMP9        | 203936_s_at  |          | 210512_s_at |
| NKX2-5      | 206578_at    |          | 212171_x_at |
| OVOL1       | 206604_at    |          | 211527_x_at |
|             | 229396_at    |          |             |

## 2B. TGFβ pathway target gene selection, literature evidence and associated references

RE: Response element (enhancer element/binding motif)

PR: promoter reporter (e.g. luciferase) experiment

ChIP: Chromatin Immuno Precipitation

EMSA: Electrophoretic Mobility Shift Assay

DE: differential expression between samples with active and inactive pathway

Score: cumulative score

| Target genes | Reference                 | RE | PR | ChIP | DE | Score |
|--------------|---------------------------|----|----|------|----|-------|
| ANGPTL4      | [29],[30],                | 1  |    |      | 1  | 2     |
| CDC42EP3     | [31]                      | 1  |    |      | 1  | 2     |
| CDKN1A       | [31],[32],[33]            | 1  |    |      | 1  | 2     |
| CDKN2B       | [31];[32],[34]            | 1  |    |      |    | 1     |
| CTGF         | [31],[35], [36],[37],[29] | 1  |    |      | 1  | 2     |
| GADD45A      | [31]                      | 1  |    |      | 1  | 2     |
| HMGA2        | [29],[38],[39]            | 1  | 1  | 1    | 1  | 3     |
| ID1          | [40],[41],[29]            | 1  | 1  |      | 1  | 2     |
| IL11         | [35],[42]                 |    |    |      | 1  | 1     |
| INPP5D       | [43]                      |    |    |      | 1  | 1     |
| JUNB         | [44],[45],[46],[39]       | 1  | 1  |      | 1  | 3     |
| MMP2         | [47],[48]                 |    |    |      | 1  | 1     |
| MMP9         | [47],[48]                 |    |    |      | 1  | 1     |
| NKX2-5       | [49]                      | 1  |    |      | 1  | 2     |
| OVOL1        | [31]                      | 1  |    |      | 1  | 2     |
| PDGFB        | [31],[29]                 | 1  |    |      | 1  | 2     |
| PTHLH        | [50],[35],[29]            | 1  |    |      | 1  | 2     |
| SERPINE1     | [37],[36],[51]            | 1  |    |      | 1  | 2     |
| SGK1         | [31]                      | 1  |    |      | 1  | 2     |
| SKIL         | [52]                      |    |    |      | 1  | 1     |
| SMAD4        | [33]                      | 1  |    |      | 1  | 2     |
| SMAD5        | [53]                      | 1  |    |      |    | 1     |
| SMAD7        | [54],[33],[51]            | 1  |    |      | 1  | 2     |
| SNAI1        | [39],[29]                 | 1  |    |      | 1  | 2     |
| TIMP1        | [48]                      |    |    |      | 1  | 1     |
| VEGFA        | [29],[29],[55],[35]       | 1  | 1  |      | 1  | 4     |

*Additional general references: [56];[57];[58];[59],[60]*



### 3A. Hedgehog pathway target gene probeset list

| Gene  | Probeset    | Gene    | Probeset     |
|-------|-------------|---------|--------------|
| BCL2  | 203684_s_at | HHIP    | 1556037_s_at |
|       | 203685_at   |         | 223775_at    |
|       | 207004_at   |         | 237466_s_at  |
|       | 207005_s_at | IGFBP6  | 203851_at    |
| CCND1 | 208711_s_at | IL1R2   | 205403_at    |
|       | 208712_at   |         | 211372_s_at  |
|       | 214019_at   | JAG2    | 209784_s_at  |
| CCND2 | 200951_s_at | JUP     | 32137_at     |
|       | 200952_s_at |         | 201015_s_at  |
|       | 200953_s_at |         |              |
|       | 231259_s_at | MYCN    | 209756_s_at  |
| CFLAR | 208485_x_at | MYLK    | 209757_s_at  |
|       | 209508_x_at |         | 211377_x_at  |
|       | 209939_x_at |         | 234376_at    |
|       | 210563_x_at | MYLK    | 1563466_at   |
|       | 210564_x_at |         | 1568770_at   |
|       | 211316_x_at |         | 202555_s_at  |
|       | 211317_s_at |         | 224823_at    |
|       | 211862_x_at | NKX2-2  | 206915_at    |
|       | 214486_x_at | NKX2-8  | 207451_at    |
|       | 214618_at   | PITRM1  | 205273_s_at  |
|       | 235427_at   | PTCH1   | 1555520_at   |
|       | 239629_at   |         | 208522_s_at  |
|       | 224261_at   |         | 209815_at    |
|       |             |         | 209816_at    |
| CTSL  | 202087_s_at |         |              |
| FOXA2 | 210103_s_at | PTCH2   | 221292_at    |
|       | 40284_at    | RAB34   | 1555630_a_at |
| FOXF1 | 205935_at   |         | 224710_at    |
| FOXL1 | 216572_at   | S100A7  | 205916_at    |
|       | 243409_at   | S100A9  | 203535_at    |
| FOXM1 | 202580_x_at | SPP1    | 209875_s_at  |
| FST   | 204948_s_at | TCEA2   | 203919_at    |
|       | 207345_at   |         | 238173_at    |
|       | 226847_at   |         | 241428_x_at  |
| FYN   | 1559101_at  | TOM1    | 202807_s_at  |
|       | 210105_s_at | TSC22D1 | 215111_s_at  |
|       | 212486_s_at |         | 243133_at    |
|       | 216033_s_at |         | 239123_at    |
| GLI1  | 206646_at   |         |              |

|      |             |
|------|-------------|
| GLI3 | 1569342_at  |
|      | 205201_at   |
|      | 227376_at   |
| H19  | 224646_x_at |
|      | 224997_x_at |

### 3B. Hedgehog pathway target gene selection, literature evidence and references

RE: Response element (enhancer element/binding motif)

PR: promoter reporter (e.g. luciferase) experiment

ChIP: Chromatin Immuno Precipitation

EMSA: Electrophoretic Mobility Shift Assay

DE: differential expression between samples with active and inactive pathway

CHX: differential expression in the presence of cycloheximide

TF: transcription factor

Score: cumulative score

| NAME           | REFERENCES               | PR | RE | EMSA | CHIP | DE | CHX | stable trans-<br>fection TF | SCORE |
|----------------|--------------------------|----|----|------|------|----|-----|-----------------------------|-------|
| <i>GLI1</i>    | [61],[62],[63],[64],[65] |    | 1  | 1    | 1    | 1  |     |                             | 4     |
| <i>PTCH1</i>   | [61],[62],[63],[64],[65] |    | 1  |      | 1    | 1  |     |                             | 3     |
| <i>PTCH2</i>   | [61], [62]               |    | 1  |      | 1    | 1  |     |                             | 3     |
| <i>HHIP</i>    | [62]                     |    | 1  |      | 1    |    |     |                             | 2     |
| <i>SPP1</i>    | [61]                     |    | 1  | 1    |      | 1  |     | 1                           | 3     |
| <i>TSC22D1</i> | [61]                     |    |    |      |      | 1  |     | 1                           | 2     |
| <i>H19</i>     | [61]                     |    |    |      |      | 1  |     | 1                           | 2     |
| <i>IGFBP6</i>  | [61]                     |    | 1  | 1    |      | 1  |     | 1                           | 4     |
| <i>TOM1</i>    | [61]                     |    |    |      |      | 1  |     | 1                           | 2     |
| <i>JUP</i>     | [61],[63]                |    | 1  | 1    |      | 1  |     |                             | 3     |
| <i>nkx2-2</i>  | [62],[63]                |    | 1  |      | 1    |    |     |                             | 2     |
| <i>nkx2-8</i>  | [62]                     |    | 1  |      | 1    |    |     |                             | 2     |
| <i>FoxA2</i>   | [62]                     |    |    |      | 1    |    |     |                             | 1     |

|               |           |   |   |   |   |   |   |   |
|---------------|-----------|---|---|---|---|---|---|---|
| <i>Rab34</i>  | [62]      |   | 1 |   | 1 |   |   | 2 |
| <i>GLI3</i>   | [62]      |   |   |   | 1 |   |   | 1 |
| <i>FST</i>    | [66]      | 1 | 1 | 1 |   | 1 |   | 4 |
| <i>BCL2</i>   | [67],[68] | 1 | 1 | 1 |   | 1 |   | 4 |
| <i>CTSL</i>   | [67]      |   |   |   |   | 1 |   | 1 |
| <i>TCEA2</i>  | [67]      |   |   |   |   | 1 |   | 1 |
| <i>MYLK</i>   | [67]      |   |   |   |   | 1 |   | 1 |
| <i>FYN</i>    | [67]      |   |   |   |   | 1 |   | 1 |
| <i>PITRM1</i> | [67]      |   |   |   |   | 1 |   | 1 |
| <i>CFLAR</i>  | [69],[70] | 1 | 1 | 1 |   | 1 |   | 4 |
| <i>IL1R2</i>  | [67]      | 1 | 1 |   |   |   |   | 2 |
| <i>S100A7</i> | [67]      | 1 | 1 |   |   |   |   | 2 |
| <i>S100A9</i> | [67]      | 1 | 1 |   |   |   |   | 2 |
| <i>CCND1</i>  | [67]      | 1 | 1 |   |   |   |   | 2 |
| <i>JAG2</i>   | [67]      | 1 | 1 |   |   |   |   | 2 |
| <i>FOX M1</i> | [71]      |   |   |   |   | 1 |   | 1 |
| <i>Foxf1</i>  | [72]      | 1 | 1 | 1 | 1 | 1 |   | 5 |
| <i>FoxL1</i>  | [70]      |   | 1 | 1 | 1 | 1 |   | 4 |
| <i>CCND2</i>  | [63],[70] |   | 1 |   | 1 |   |   | 2 |
| <i>MYCN</i>   | [73],[70] |   | 1 |   |   | 1 | 1 | 3 |

#### 4A. NFkB pathway target gene selection, Affymetrix probeset selection, and associated references

RE: Response element (enhancer element/binding motif)

PR: promoter reporter (e.g. luciferase) experiment

ChIP: Chromatin Immuno Precipitation

EMSA: Electrophoretic Mobility Shift Assay

DE: differential expression between samples with active and inactive pathway

CHX differential expression in the presence of cycloheximide

Score: cumulative score

| Gene   | Probeset     | RE | PR | ChIP | EMSA | DE | CHX | Score | REFERENCES                         |
|--------|--------------|----|----|------|------|----|-----|-------|------------------------------------|
| PTGS2  | 1554997_a_at | 1  | 1  | 1    |      | 1  |     | 4     | [74],[75],[76],[77],[78],[79],[80] |
|        | 204748_at    |    |    |      |      |    |     |       |                                    |
| IL8    | 202859_x_at  | 1  | 1  | 1    |      | 1  |     | 2     | [80],[81],[82],[78],[83]           |
|        | 211506_s_at  |    |    |      |      |    |     |       |                                    |
| NFKBIE | 203927_at    | 1  | 1  | 1    |      | 1  | 1   | 5     | [83],[84] [82]                     |
| IL6    | 205207_at    | 1  |    | 1    |      | 1  |     | 3     | [76],[85],[86],[84]                |
| MMP9   | 203936_s_at  | 1  |    | 1    |      |    |     | 2     | [78]                               |
| TNF    | 207113_s_at  | 1  | 1  |      | 1    | 1  |     | 4     | [76],[78],[82], [81]               |
| ICAM1  | 202637_s_at  | 1  | 1  | 1    |      | 1  |     | 4     | [80], [86],[85], [78],[77]         |

|        |              |   |   |   |   |   |   |   |                                        |
|--------|--------------|---|---|---|---|---|---|---|----------------------------------------|
|        | 202638_s_at  |   |   |   |   |   |   |   |                                        |
|        | 215485_s_at  |   |   |   |   |   |   |   |                                        |
| CCL2   | 216598_s_at  | 1 |   |   | 1 | 1 |   | 3 | [82],[86],[77],[87]                    |
| CCL5   | 1405_i_at    | 1 | 1 |   | 1 | 1 |   | 4 | [78],[84],[81],[88]                    |
|        | 1555759_a_at |   |   |   |   |   |   |   |                                        |
|        | 204655_at    |   |   |   |   |   |   |   |                                        |
| NFKB2  | 207535_s_at  | 1 |   | 1 |   | 1 |   | 3 | [88],[76],[78],[89],[84],<br>[84],[82] |
|        | 209636_at    |   |   |   |   |   |   |   |                                        |
|        | 211524_at    |   |   |   |   |   |   |   |                                        |
| TNIP1  | 207196_s_at  | 1 |   | 1 | 1 | 1 | 1 | 5 | [83],[88],[76],[89]                    |
| VCAM1  | 203868_s_at  | 1 | 1 |   |   | 1 |   | 3 | [86],[77],[75]                         |
| SELE   | 206211_at    | 1 |   |   |   | 1 |   | 2 | [77],[85],[82]                         |
| CCL22  | 207861_at    | 1 |   | 1 |   |   |   | 2 | [81],[88]                              |
| BCL2L1 | 206665_s_at  |   |   |   | 1 | 1 |   | 2 | [88],[75],[79]                         |
|        | 212312_at    |   |   |   |   |   |   |   |                                        |
|        | 215037_s_at  |   |   |   |   |   |   |   |                                        |
|        | 231228_at    |   |   |   |   |   |   |   |                                        |

|        |             |   |   |   |   |   |  |   |                          |
|--------|-------------|---|---|---|---|---|--|---|--------------------------|
| NFKBIA | 201502_s_at | 1 |   |   |   | 1 |  | 2 | [76],[84],[82],[81]      |
|        | 231699_at   |   |   |   |   |   |  |   |                          |
| IRF1   | 202531_at   | 1 |   | 1 |   | 1 |  | 3 | [88],[76],[78]           |
|        | 238725_at   |   |   |   |   |   |  |   |                          |
| CCL20  | 205476_at   | 1 |   |   |   | 1 |  | 2 | [76],[86],[82]           |
| CX3CL1 | 203687_at   | 1 |   |   |   | 1 |  | 2 | [88],[77],[86]           |
|        | 823_at      |   |   |   |   |   |  |   |                          |
| CXCL2  | 1569203_at  | 1 |   | 1 | 1 | 1 |  | 4 | [77],[76],[75]           |
|        | 209774_x_at |   |   |   |   |   |  |   |                          |
|        | 230101_at   |   |   |   |   |   |  |   |                          |
| CXCL3  | 207850_at   | 1 |   | 1 | 1 | 1 |  | 4 | [83],[76],[78],[86]      |
|        | 205114_s_at |   |   |   |   |   |  |   |                          |
| CXCL1  | 204470_at   | 1 |   | 1 |   | 1 |  | 3 | [75],[84],[86],[78],[76] |
| IL1B   | 205067_at   | 1 | 1 |   | 1 | 1 |  | 4 | [78],[82],[87]           |
|        | 39402_at    |   |   |   |   |   |  |   |                          |
| CCL4   | 204103_at   | 1 |   | 1 |   | 1 |  | 3 | [78],[87]                |
| BIRC3  | 210538_s_at | 1 |   |   | 1 | 1 |  | 3 | [88],[89],[79],[86],[82] |
|        | 230499_at   |   |   |   |   |   |  |   |                          |

|         |             |   |  |   |   |   |   |   |                          |
|---------|-------------|---|--|---|---|---|---|---|--------------------------|
| TNFAIP2 | 202509_s_at | 1 |  |   | 1 | 1 | 1 | 4 | [81]                     |
|         | 202510_s_at |   |  |   |   |   |   |   |                          |
| STAT5A  | 203010_at   | 1 |  | 1 |   | 1 |   | 3 | [88],[78]                |
| TRAF1   | 205599_at   | 1 |  | 1 |   | 1 |   | 3 | [88],[76],[77],[78],[79] |
|         | 235116_at   |   |  |   |   |   |   |   |                          |
| CCL3    | 205114_s_at | 1 |  | 1 |   | 1 |   | 3 | [88],[76]                |

#### Reference list for selected AR, TGFbeta, HH, and NFkB pathway target genes

- [1] J. C. Zhao *e.a.*, “Cooperation between Polycomb and androgen receptor during oncogenic transformation”, *Genome Res.*, vol. 22, nr. 2, pp. 322–331, feb. 2012.
- [2] C. E. Massie *e.a.*, “The androgen receptor fuels prostate cancer by regulating central metabolism and biosynthesis: AR coordinates anabolic program in prostate cancer”, *EMBO J.*, vol. 30, nr. 13, pp. 2719–2733, jul. 2011.
- [3] Q. Wang *e.a.*, “A Hierarchical Network of Transcription Factors Governs Androgen Receptor-Dependent Prostate Cancer Growth”, *Mol. Cell*, vol. 27, nr. 3, pp. 380–392, aug. 2007.
- [4] “ChIP analysis of androgen regulation of transcriptional activity”, *Previews*. [Online]. Beschikbaar op: <http://www.piercenet.com/previews/2013-articles/chip-analysis-androgen-regulation-transcription/>. [Geraadpleegd: 09-apr-2014].
- [5] J. Yu *e.a.*, “An Integrated Network of Androgen Receptor, Polycomb, and TMPRSS2-ERG Gene Fusions in Prostate Cancer Progression”, *Cancer Cell*, vol. 17, nr. 5, pp. 443–454, mei 2010.
- [6] A. Urbanucci *e.a.*, “Overexpression of androgen receptor enhances the binding of the receptor to the chromatin in prostate cancer”, *Oncogene*, vol. 31, nr. 17, pp. 2153–2163, apr. 2012.
- [7] P. S. Nelson *e.a.*, “The program of androgen-responsive genes in neoplastic prostate epithelium”, *Proc. Natl. Acad. Sci. U. S. A.*, vol. 99, nr. 18, pp. 11890–11895, sep. 2002.



- [8] M. Jiang *e.a.*, “Androgen-responsive gene database: integrated knowledge on androgen-responsive genes”, *Mol. Endocrinol. Baltim. Md*, vol. 23, nr. 11, pp. 1927–1933, nov. 2009.
- [9] T. Segawa *e.a.*, “Androgen-induced expression of endoplasmic reticulum (ER) stress response genes in prostate cancer cells”, *Oncogene*, vol. 21, nr. 57, pp. 8749–8758, dec. 2002.
- [10] A. M. Velasco *e.a.*, “Identification and validation of novel androgen-regulated genes in prostate cancer”, *Endocrinology*, vol. 145, nr. 8, pp. 3913–3924, aug. 2004.
- [11] H. V. Heemers *e.a.*, “Identification of a Clinically Relevant Androgen-Dependent Gene Signature in Prostate Cancer”, *Cancer Res.*, vol. 71, nr. 5, pp. 1978–1988, mrt. 2011.
- [12] G. Wang, S. J. M. Jones, M. A. Marra, en M. D. Sadar, “Identification of genes targeted by the androgen and PKA signaling pathways in prostate cancer cells”, *Oncogene*, vol. 25, nr. 55, pp. 7311–7323, jun. 2006.
- [13] S. H. Mitchell, P. E. Murtha, S. Zhang, W. Zhu, en C. Y. F. Young, “An androgen response element mediates LNCaP cell dependent androgen induction of the hK2 gene”, *Mol. Cell. Endocrinol.*, vol. 168, nr. 1–2, pp. 89–99, okt. 2000.
- [14] J. A. Magee, L. Chang, G. D. Stormo, en J. Milbrandt, “Direct, androgen receptor-mediated regulation of the FKBP5 gene via a distal enhancer element”, *Endocrinology*, vol. 147, nr. 1, pp. 590–598, jan. 2006.
- [15] E. C. Bolton, A. Y. So, C. Chaivorapol, C. M. Haqq, H. Li, en K. R. Yamamoto, “Cell- and gene-specific regulation of primary target genes by the androgen receptor”, *Genes Dev.*, vol. 21, nr. 16, pp. 2005–2017, aug. 2007.
- [16] C. Cai *e.a.*, “Androgen regulation of soluble guanylyl cyclase $\alpha$ 1 mediates prostate cancer cell proliferation”, *Oncogene*, vol. 26, nr. 11, pp. 1606–1615, mrt. 2007.
- [17] D. Wu *e.a.*, “Three-tiered role of the pioneer factor GATA2 in promoting androgen-dependent gene expression in prostate cancer”, *Nucleic Acids Res.*, vol. 42, nr. 6, pp. 3607–3622, apr. 2014.
- [18] S. Denayer, C. Helsen, L. Thorrez, A. Haelens, en F. Claessens, “The rules of DNA recognition by the androgen receptor”, *Mol. Endocrinol. Baltim. Md*, vol. 24, nr. 5, pp. 898–913, mei 2010.
- [19] C. Cai, J. Omwancha, C.-L. Hsieh, en L. Shemshedini, “Androgen induces expression of the multidrug resistance protein gene MRP4 in prostate cancer cells”, *Prostate Cancer Prostatic Dis.*, vol. 10, nr. 1, pp. 39–45, sep. 2006.
- [20] Y. Wu *e.a.*, “Identification of androgen response elements in the insulin-like growth factor I upstream promoter”, *Endocrinology*, vol. 148, nr. 6, pp. 2984–2993, jun. 2007.
- [21] S. Lu, M. Liu, D. E. Epner, S. Y. Tsai, en M. J. Tsai, “Androgen regulation of the cyclin-dependent kinase inhibitor p21 gene through an androgen response element in the proximal promoter”, *Mol. Endocrinol. Baltim. Md*, vol. 13, nr. 3, pp. 376–384, mrt. 1999.

- [22] S. Lu, G. Jenster, en D. E. Epner, "Androgen induction of cyclin-dependent kinase inhibitor p21 gene: role of androgen receptor and transcription factor Sp1 complex", *Mol. Endocrinol. Baltim. Md*, vol. 14, nr. 5, pp. 753–760, mei 2000.
- [23] K. Takayama *e.a.*, "Amyloid Precursor Protein Is a Primary Androgen Target Gene That Promotes Prostate Cancer Growth", *Cancer Res.*, vol. 69, nr. 1, pp. 137–142, jan. 2009.
- [24] C. P. Evans, E. C. Stapp, M. A. Dall'Era, J. Juarez, en J. C. Yang, "Regulation of u-PA gene expression in human prostate cancer", *Int. J. Cancer J. Int. Cancer*, vol. 94, nr. 3, pp. 390–395, nov. 2001.
- [25] H. Qi *e.a.*, "AlbZIP, a novel bZIP gene located on chromosome 1q21.3 that is highly expressed in prostate tumors and of which the expression is up-regulated by androgens in LNCaP human prostate cancer cells", *Cancer Res.*, vol. 62, nr. 3, pp. 721–733, feb. 2002.
- [26] M.-H. Levesque, M. El-Alfy, L. Berger, F. Labrie, en C. Labrie, "Evaluation of AlbZIP and Cdc47 as markers for human prostatic diseases", *Urology*, vol. 69, nr. 1, pp. 196–201, jan. 2007.
- [27] A.-K. Kvissel, H. Ramberg, T. Eide, A. Svindland, B. S. Skålhegg, en K. A. Taskén, "Androgen dependent regulation of protein kinase A subunits in prostate cancer cells", *Cell. Signal.*, vol. 19, nr. 2, pp. 401–409, feb. 2007.
- [28] I. Sehgal, S. Powers, B. Huntley, G. Powis, M. Pittelkow, en N. J. Maihle, "Neurotensin is an autocrine trophic factor stimulated by androgen withdrawal in human prostate cancer", *Proc. Natl. Acad. Sci.*, vol. 91, nr. 11, pp. 4673–4677, mei 1994.
- [29] D. Padua en J. Massagué, "Roles of TGFbeta in metastasis", *Cell Res.*, vol. 19, nr. 1, pp. 89–102, jan. 2009.
- [30] D. Padua *e.a.*, "TGFbeta primes breast tumors for lung metastasis seeding through angiopoietin-like 4", *Cell*, vol. 133, nr. 1, pp. 66–77, apr. 2008.
- [31] R. R. Gomis *e.a.*, "A FoxO-Smad synexpression group in human keratinocytes", *Proc. Natl. Acad. Sci. U. S. A.*, vol. 103, nr. 34, pp. 12747–12752, aug. 2006.
- [32] C. Hesling *e.a.*, "Antagonistic regulation of EMT by TIF1 $\gamma$  and Smad4 in mammary epithelial cells", *EMBO Rep.*, vol. 12, nr. 7, pp. 665–672, jul. 2011.
- [33] J. Seoane, H.-V. Le, L. Shen, S. A. Anderson, en J. Massagué, "Integration of Smad and forkhead pathways in the control of neuroepithelial and glioblastoma cell proliferation", *Cell*, vol. 117, nr. 2, pp. 211–223, apr. 2004.
- [34] M. B. Buck en C. Knabbe, "TGF-beta signaling in breast cancer", *Ann. N. Y. Acad. Sci.*, vol. 1089, pp. 119–126, nov. 2006.
- [35] M. Petersen *e.a.*, "Smad2 and Smad3 have opposing roles in breast cancer bone metastasis by differentially affecting tumor angiogenesis", *Oncogene*, vol. 29, nr. 9, pp. 1351–1361, mrt. 2010.
- [36] K. S. Hoek *e.a.*, "Metastatic potential of melanomas defined by specific gene expression profiles with no BRAF signature", *Pigment Cell Res.*, vol. 19, nr. 4, pp. 290–302, aug. 2006.
- [37] R. Samarakoon *e.a.*, "Induction of renal fibrotic genes by TGF- $\beta$ 1 requires EGFR activation, p53 and reactive oxygen species", *Cell. Signal.*, vol. 25, nr. 11, pp. 2198–2209, nov. 2013.

- [38] S. Thuault, U. Valcourt, M. Petersen, G. Manfioletti, C.-H. Heldin, en A. Moustakas, "Transforming growth factor-beta employs HMGA2 to elicit epithelial-mesenchymal transition", *J. Cell Biol.*, vol. 174, nr. 2, pp. 175–183, jul. 2006.
- [39] E. Kubo, S. Shibata, T. Shibata, E. Kiyokawa, H. Sasaki, en D. P. Singh, "FGF2 antagonizes aberrant TGF $\beta$  regulation of tropomyosin: role for posterior capsule opacity", *J. Cell. Mol. Med.*, vol. 21, nr. 5, pp. 916–928, 2017.
- [40] T. Katagiri en S. Tsukamoto, "The unique activity of bone morphogenetic proteins in bone: a critical role of the Smad signaling pathway", *Biol. Chem.*, vol. 394, nr. 6, pp. 703–714, jun. 2013.
- [41] E. Wiercinska *e.a.*, "Id1 is a critical mediator in TGF-beta-induced transdifferentiation of rat hepatic stellate cells", *Hepatol. Baltim. Md*, vol. 43, nr. 5, pp. 1032–1041, mei 2006.
- [42] A. Calon *e.a.*, "Dependency of colorectal cancer on a TGF- $\beta$ -driven program in stromal cells for metastasis initiation", *Cancer Cell*, vol. 22, nr. 5, pp. 571–584, nov. 2012.
- [43] F. Li, L. Li, J. Hao, S. Liu, en H. Duan, "Src Homology 2 Domain-Containing Inositol 5'-Phosphatase Ameliorates High Glucose-Induced Extracellular Matrix Deposition via the Phosphatidylinositol 3-Kinase/Protein Kinase B Pathway in Renal Tubular Epithelial Cells", *J. Cell. Biochem.*, vol. 118, nr. 8, pp. 2271–2284, 2017.
- [44] L. J. Jonk, S. Itoh, C. H. Heldin, P. ten Dijke, en W. Kruijjer, "Identification and functional characterization of a Smad binding element (SBE) in the JunB promoter that acts as a transforming growth factor-beta, activin, and bone morphogenetic protein-inducible enhancer", *J. Biol. Chem.*, vol. 273, nr. 33, pp. 21145–21152, aug. 1998.
- [45] K.-S. Lee, S.-H. Hong, en S.-C. Bae, "Both the Smad and p38 MAPK pathways play a crucial role in Runx2 expression following induction by transforming growth factor-beta and bone morphogenetic protein", *Oncogene*, vol. 21, nr. 47, pp. 7156–7163, okt. 2002.
- [46] F. Verrecchia, C. Tacheau, M. Schorpp-Kistner, P. Angel, en A. Mauviel, "Induction of the AP-1 members c-Jun and JunB by TGF-beta/Smad suppresses early Smad-driven gene activation", *Oncogene*, vol. 20, nr. 18, pp. 2205–2211, apr. 2001.
- [47] M. Pickup, S. Novitskiy, en H. L. Moses, "The roles of TGF $\beta$  in the tumour microenvironment", *Nat. Rev. Cancer*, vol. 13, nr. 11, pp. 788–799, nov. 2013.
- [48] H.-J. Kwak *e.a.*, "Transforming growth factor-beta1 induces tissue inhibitor of metalloproteinase-1 expression via activation of extracellular signal-regulated kinase and Sp1 in human fibrosarcoma cells", *Mol. Cancer Res. MCR*, vol. 4, nr. 3, pp. 209–220, mrt. 2006.
- [49] C. O. Brown, X. Chi, E. Garcia-Gras, M. Shirai, X.-H. Feng, en R. J. Schwartz, "The cardiac determination factor, Nkx2-5, is activated by mutual cofactors GATA-4 and Smad1/4 via a novel upstream enhancer", *J. Biol. Chem.*, vol. 279, nr. 11, pp. 10659–10669, mrt. 2004.
- [50] Y. Y. Sheen, M.-J. Kim, S.-A. Park, S.-Y. Park, en J.-S. Nam, "Targeting the Transforming Growth Factor- $\beta$  Signaling in Cancer Therapy", *Biomol. Ther.*, vol. 21, nr. 5, pp. 323–331, sep. 2013.
- [51] J. Massagué en Q. Xi, "TGF- $\beta$  control of stem cell differentiation genes", *FEBS Lett.*, vol. 586, nr. 14, pp. 1953–1958, jul. 2012.
- [52] J. Massagué, J. Seoane, en D. Wotton, "Smad transcription factors", *Genes Dev.*, vol. 19, nr. 23, pp. 2783–2810, dec. 2005.

- [53] A. Moustakas, S. Souchelnytskyi, en C. H. Heldin, "Smad regulation in TGF-beta signal transduction", *J. Cell Sci.*, vol. 114, nr. Pt 24, pp. 4359–4369, dec. 2001.
- [54] L. Ciucan *e.a.*, "TGF-beta enhances alcohol dependent hepatocyte damage via down-regulation of alcohol dehydrogenase I", *J. Hepatol.*, vol. 52, nr. 3, pp. 407–416, mrt. 2010.
- [55] T. Sánchez-Elsner, L. M. Botella, B. Velasco, A. Corbí, L. Attisano, en C. Bernabéu, "Synergistic cooperation between hypoxia and transforming growth factor-beta pathways on human vascular endothelial growth factor gene expression", *J. Biol. Chem.*, vol. 276, nr. 42, pp. 38527–38535, okt. 2001.
- [56] J. E. Chipuk *e.a.*, "The androgen receptor represses transforming growth factor-beta signaling through interaction with Smad3", *J. Biol. Chem.*, vol. 277, nr. 2, pp. 1240–1248, jan. 2002.
- [57] B. I. Dalal, P. A. Keown, en A. H. Greenberg, "Immunocytochemical localization of secreted transforming growth factor-beta 1 to the advancing edges of primary tumors and to lymph node metastases of human mammary carcinoma", *Am. J. Pathol.*, vol. 143, nr. 2, pp. 381–389, aug. 1993.
- [58] Y. Kang *e.a.*, "A multigenic program mediating breast cancer metastasis to bone", *Cancer Cell*, vol. 3, nr. 6, pp. 537–549, jun. 2003.
- [59] L. Mishra, R. Derynck, en B. Mishra, "Transforming growth factor-beta signaling in stem cells and cancer", *Science*, vol. 310, nr. 5745, pp. 68–71, okt. 2005.
- [60] P. M. Siegel en J. Massagué, "Cytostatic and apoptotic actions of TGF-beta in homeostasis and cancer", *Nat. Rev. Cancer*, vol. 3, nr. 11, pp. 807–821, nov. 2003.
- [61] J. W. Yoon *e.a.*, "Gene Expression Profiling Leads to Identification of GLI1-binding Elements in Target Genes and a Role for Multiple Downstream Pathways in GLI1-induced Cell Transformation", *J. Biol. Chem.*, vol. 277, nr. 7, pp. 5548–5555, feb. 2002.
- [62] S. A. Vokes, H. Ji, W. H. Wong, en A. P. McMahon, "A genome-scale analysis of the cis-regulatory circuitry underlying sonic hedgehog-mediated patterning of the mammalian limb", *Genes Dev.*, vol. 22, nr. 19, pp. 2651–2663, okt. 2008.
- [63] M. H. Shahi *e.a.*, "Regulation of sonic hedgehog-GLI1 downstream target genes PTCH1, Cyclin D2, Plakoglobin, PAX6 and NKX2.2 and their epigenetic status in medulloblastoma and astrocytoma", *BMC Cancer*, vol. 10, p. 614, nov. 2010.
- [64] F. Götschel *e.a.*, "Synergism between Hedgehog-GLI and EGFR signaling in Hedgehog-responsive human medulloblastoma cells induces downregulation of canonical Hedgehog-target genes and stabilized expression of GLI1", *PLoS One*, vol. 8, nr. 6, p. e65403, 2013.
- [65] A. Shaw, J. Gipp, en W. Bushman, "The Sonic Hedgehog pathway stimulates prostate tumor growth by paracrine signaling and recapitulates embryonic gene expression in tumor myofibroblasts", *Oncogene*, vol. 28, nr. 50, pp. 4480–4490, dec. 2009.
- [66] T. Eichberger *e.a.*, "GLI2-specific transcriptional activation of the bone morphogenetic protein/activin antagonist follistatin in human epidermal cells", *J. Biol. Chem.*, vol. 283, nr. 18, pp. 12426–12437, mei 2008.
- [67] M. Kasper *e.a.*, "Selective modulation of Hedgehog/GLI target gene expression by epidermal growth factor signaling in human keratinocytes", *Mol. Cell. Biol.*, vol. 26, nr. 16, pp. 6283–6298, aug. 2006.
- [68] G. Regl *e.a.*, "Activation of the BCL2 promoter in response to Hedgehog/GLI signal transduction is predominantly mediated by GLI2", *Cancer Res.*, vol. 64, nr. 21, pp. 7724–7731, nov. 2004.

- [69] E. Kump, J. Ji, M. Wernli, P. Häusermann, en P. Erb, "Gli2 upregulates cFlip and renders basal cell carcinoma cells resistant to death ligand-mediated apoptosis", *Oncogene*, vol. 27, nr. 27, pp. 3856–3864, jun. 2008.
- [70] Y. Katoh en M. Katoh, "Hedgehog target genes: mechanisms of carcinogenesis induced by aberrant hedgehog signaling activation", *Curr. Mol. Med.*, vol. 9, nr. 7, pp. 873–886, sep. 2009.
- [71] D. Wang *e.a.*, "Aberrant activation of hedgehog signaling promotes cell proliferation via the transcriptional activation of forkhead Box M1 in colorectal cancer cells", *J. Exp. Clin. Cancer Res. CR*, vol. 36, nr. 1, p. 23, 02 2017.
- [72] T. Bohnenpoll *e.a.*, "A SHH-FOXF1-BMP4 signaling axis regulating growth and differentiation of epithelial and mesenchymal tissues in ureter development", *PLoS Genet.*, vol. 13, nr. 8, p. e1006951, aug. 2017.
- [73] A. M. Kenney en D. H. Rowitch, "Sonic hedgehog promotes G(1) cyclin expression and sustained cell cycle progression in mammalian neuronal precursors", *Mol. Cell. Biol.*, vol. 20, nr. 23, pp. 9055–9067, dec. 2000.
- [74] A. Yoshimura, "Signal transduction of inflammatory cytokines and tumor development", *Cancer Sci.*, vol. 97, nr. 6, pp. 439–447, jun. 2006.
- [75] K. I. Amiri en A. Richmond, "Role of nuclear factor-kappa B in melanoma", *Cancer Metastasis Rev.*, vol. 24, nr. 2, pp. 301–313, jun. 2005.
- [76] B. Tian, D. E. Nowak, en A. R. Brasier, "A TNF-induced gene expression program under oscillatory NF-kappaB control", *BMC Genomics*, vol. 6, p. 137, sep. 2005.
- [77] T. Minami, A. Sugiyama, S.-Q. Wu, R. Abid, T. Kodama, en W. C. Aird, "Thrombin and phenotypic modulation of the endothelium", *Arterioscler. Thromb. Vasc. Biol.*, vol. 24, nr. 1, pp. 41–53, jan. 2004.
- [78] J. Schreiber, R. G. Jenner, H. L. Murray, G. K. Gerber, D. K. Gifford, en R. A. Young, "Coordinated binding of NF-kappaB family members in the response of human cells to lipopolysaccharide", *Proc. Natl. Acad. Sci. U. S. A.*, vol. 103, nr. 15, pp. 5899–5904, apr. 2006.
- [79] G. Sethi, K. S. Ahn, S. K. Sandur, X. Lin, M. M. Chaturvedi, en B. B. Aggarwal, "Indirubin enhances tumor necrosis factor-induced apoptosis through modulation of nuclear factor-kappa B signaling pathway", *J. Biol. Chem.*, vol. 281, nr. 33, pp. 23425–23435, aug. 2006.
- [80] R. Martone *e.a.*, "Distribution of NF-kappaB-binding sites across human chromosome 22", *Proc. Natl. Acad. Sci. U. S. A.*, vol. 100, nr. 21, pp. 12247–12252, okt. 2003.
- [81] S. Sacconi, S. Pantano, en G. Natoli, "Modulation of NF-kappaB activity by exchange of dimers", *Mol. Cell*, vol. 11, nr. 6, pp. 1563–1574, jun. 2003.
- [82] M. R. Milward, I. L. C. Chapple, H. J. Wright, J. L. Millard, J. B. Matthews, en P. R. Cooper, "Differential activation of NF-kappaB and gene expression in oral epithelial cells by periodontal pathogens", *Clin. Exp. Immunol.*, vol. 148, nr. 2, pp. 307–324, mei 2007.
- [83] B. Tian, D. E. Nowak, M. Jamaluddin, S. Wang, en A. R. Brasier, "Identification of direct genomic targets downstream of the nuclear factor-kappaB transcription factor mediating tumor necrosis factor signaling", *J. Biol. Chem.*, vol. 280, nr. 17, pp. 17435–17448, apr. 2005.
- [84] H. J. Choi *e.a.*, "Genome-wide identification of palmitate-regulated immediate early genes and target genes in pancreatic beta-cells reveals a central role of NF-κB", *Mol. Biol. Rep.*, vol. 39, nr. 6, pp. 6781–6789, jun. 2012.

- [85] G. B. Fogel *e.a.*, "Discovery of sequence motifs related to coexpression of genes using evolutionary computation", *Nucleic Acids Res.*, vol. 32, nr. 13, pp. 3826–3835, 2004.
- [86] D. Viemann *e.a.*, "The contact allergen nickel triggers a unique inflammatory and proangiogenic gene expression pattern via activation of NF-kappaB and hypoxia-inducible factor-1alpha", *J. Immunol. Baltim. Md 1950*, vol. 178, nr. 5, pp. 3198–3207, mrt. 2007.
- [87] M. Delgado en D. Ganea, "Inhibition of endotoxin-induced macrophage chemokine production by vasoactive intestinal peptide and pituitary adenylate cyclase-activating polypeptide in vitro and in vivo", *J. Immunol. Baltim. Md 1950*, vol. 167, nr. 2, pp. 966–975, jul. 2001.
- [88] M. Hinz *e.a.*, "Nuclear factor kappaB-dependent gene expression profiling of Hodgkin's disease tumor cells, pathogenetic significance, and link to constitutive signal transducer and activator of transcription 5a activity", *J. Exp. Med.*, vol. 196, nr. 5, pp. 605–617, sep. 2002.
- [89] R. Elkon, C. Linhart, Y. Halperin, Y. Shiloh, en R. Shamir, "Functional genomic delineation of TLR-induced transcriptional networks", *BMC Genomics*, vol. 8, p. 394, okt. 2007.

## **Comparison between Gene Set Enrichment Analysis (GSEA) and Pathway analysis on two groups of samples in a dataset**

GEO dataset GSE8671 contains Affymetrix HG-U133Plus2.0 data of 64 patient samples: 32 colon adenomas and 32 matched normal colon samples. The Wnt pathway is known to be the dominant signaling pathway that is active in colon adenoma and carcinoma (e.g. work of Hans Clevers, e.g. Bienz M, Clevers H, Cell. 2000 Oct 13;103(2):311-20; Radtke F, Clevers H, Science. 2005 Mar 25;307(5717):1904-9.)

Analysis of individual sample data with our pathway analysis approach, revealed the Wnt pathway as the most prominently active pathway, with the Wnt pathway active in colon adenoma samples and inactive in normal colon samples; the other dominant pathway was the PI3K pathway, which was found active in the majority of the colon adenoma samples, and not in the normal tissue samples (Verhaegh et al., Cancer Res. 2014 Jun 1;74(11):2936-45; and van Ooijen et al. [Am J Pathol.](#) 2018 Sep;188(9):1956-1972).

GSEA was performed on the two groups of samples (colon adenoma versus normal colon) resulting in the Wnt pathway showing up for the first time at rank 87, with a false-discovery rate corrected p-value of 0.038, while other Wnt-related pathways were not significantly upregulated (see Table A below). The PI3K pathway did not show up as a significantly upregulated (Table D). In contrast, many other pathways were listed in the top 10 up- or downregulated pathways without any clear biological relation to colon adenomas vs. normal colon (Tables B-C).

### Results GSEA:

#### A. Ranks of upregulated Wnt-related 'pathways' as reported by GSEA:

| Rank | Name                        | NOM p-val | FDR q-val | FWER p-val |
|------|-----------------------------|-----------|-----------|------------|
| 87   | REACTOME_SIGNALING_BY_WNT   | 0.027     | 0.038     | 0.772      |
| 176  | KEGG_WNT_SIGNALING_PATHWAY  | 0.350     | 0.583     | 1.000      |
| 194  | BIOCARTA_WNT_PATHWAY        | 0.481     | 0.672     | 1.000      |
| 199  | WNT_SIGNALING               | 0.518     | 0.691     | 1.000      |
| 216  | ST_WNT_BETA_CATENIN_PATHWAY | 0.675     | 0.801     | 1.000      |

#### B. Top 10 pathways that were 'upregulated' in colon adenoma according to GSEA:

| Rank | Name                                     | NOM p-val | FDR q-val | FWER p-val |
|------|------------------------------------------|-----------|-----------|------------|
| 1    | REACTOME_TRANSCRIPTION_OF_THE_HIV_GENOME | 0.000     | 0.024     | 0.025      |
| 2    | REACTOME_RNA_POLYMERASE_II_TRANSCRIPTION | 0.000     | 0.018     | 0.035      |

|    |                                                      |       |       |       |
|----|------------------------------------------------------|-------|-------|-------|
| 3  | REACTOME_LATE_PHASE_OF_HIV_LIFE_CYCLE                | 0.000 | 0.012 | 0.035 |
| 4  | REACTOME_FORMATION_AND_MATURATION_OF_MRNA_TRANSCRIPT | 0.000 | 0.016 | 0.060 |
| 5  | KEGG_UBIQUITIN_MEDIATED_PROTEOLYSIS                  | 0.000 | 0.016 | 0.071 |
| 6  | REACTOME_DNA_REPAIR                                  | 0.000 | 0.015 | 0.079 |
| 7  | REACTOME_GENE_EXPRESSION                             | 0.000 | 0.014 | 0.090 |
| 8  | KEGG_RNA_DEGRADATION                                 | 0.002 | 0.014 | 0.096 |
| 9  | REACTOME_HIV1_TRANSCRIPTION_INITIATION               | 0.000 | 0.013 | 0.099 |
| 10 | REACTOME_HIV1_TRANSCRIPTION_ELONGATION               | 0.000 | 0.012 | 0.106 |

C. Top 10 'pathways' that were 'downregulated' in colon adenoma according to GSEA:

| Rank | Name                                                          | NOM p-val | FDR q-val | FWER p-val |
|------|---------------------------------------------------------------|-----------|-----------|------------|
| 1    | REACTOME_TCR_SIGNALING                                        | 0.016     | 1.000     | 0.863      |
| 2    | BIOCARTA_TFF_PATHWAY                                          | 0.025     | 1.000     | 0.878      |
| 3    | REACTOME_INTEGRIN_CELL_SURFACE_INTERACTIONS                   | 0.002     | 1.000     | 0.929      |
| 4    | KEGG_DRUG_METABOLISM_OTHER_ENZYMES                            | 0.008     | 1.000     | 0.948      |
| 5    | KEGG_INTESTINAL_IMMUNE_NETWORK_FOR_IGA_PRODUCTION             | 0.008     | 1.000     | 0.958      |
| 6    | KEGG_FC_GAMMA_R_MEDIATED_PHAGOCYTOSIS                         | 0.032     | 1.000     | 0.959      |
| 7    | KEGG_GLYCOSPHINGOLIPID_BIOSYNTHESIS_LACTO_AND_NEOLACTO_SERIES | 0.010     | 1.000     | 0.959      |
| 8    | REACTOME_GS_ALPHA_MEDIATED_EVENTS_IN_GLUCAGON_SIGNALLING      | 0.002     | 1.000     | 0.969      |
| 9    | REACTOME_DOWNSTREAM_TCR_SIGNALING                             | 0.045     | 1.000     | 0.969      |
| 10   | BIOCARTA_AKT_PATHWAY                                          | 0.027     | 1.000     | 0.970      |

D. PI3K-related pathway analysis with GSEA on GSE8671:

| <b>Upregulated in colon adenomas</b>   |                              |           |           |            |
|----------------------------------------|------------------------------|-----------|-----------|------------|
| Rank                                   | Name                         | NOM p-val | FDR q-val | FWER p-val |
| 151                                    | REACTOME_PI3K_AKT_SIGNALLING | 0.192     | 0.336     | 1.000      |
| <b>Downregulated in colon adenomas</b> |                              |           |           |            |



| Rank | Name                                               | NOM p-val | FDR q-val | FWER p-val |
|------|----------------------------------------------------|-----------|-----------|------------|
| 26   | REACTOME_G_BETA_GAMMA_SIGNALLING_THROUGH_PI3KGAMMA | 0.018     | 0.829     | 0.997      |
| 147  | REACTOME_PI3K_CASCADE                              | 0.116     | 0.431     | 1.000      |
| 296  | REACTOME_CD28_DEPENDENT_PI3K_AKT_SIGNALING         | 0.432     | 0.604     | 1.000      |
